# Supplementary material
Source: Springer Nature journal article supplement (https://www.springermedizin.de/resource/supplementary/12936_2013_3152_MOESM2_ESM.pdf/9546286)
Supplement: MOESM2 [file 9546286]

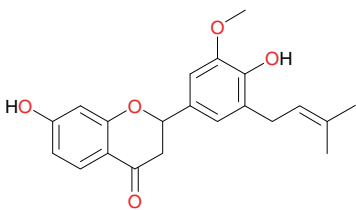

5-Deoxyabyssinin II (20)

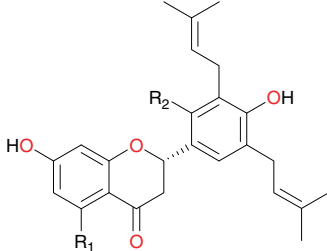

Abyssinone IV (21): R = H, R<sub>2</sub> = H, R<sub>3</sub> = Prenyl, R<sub>4</sub> = Prenyl

Abyssinone V (22): R = OH, R<sub>2</sub> = H, R<sub>3</sub> = Prenyl, R<sub>4</sub> = Prenyl

Sigmoidin A (23): R<sub>1</sub> = OH, R<sub>2</sub> = Prenyl, R<sub>3</sub> = OH, R<sub>4</sub> = Prenyl

Sigmoidin B (24): R<sub>1</sub> = OH, R<sub>2</sub> = H, R<sub>3</sub> = Prenyl, R<sub>4</sub> = OH

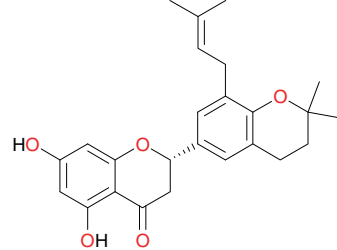

Sigmoidin E (25)

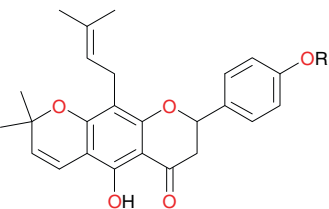

(S)-Lupinifolin 4'-methyl ether (26): R = CH<sub>3</sub>

Lupinifolin (27): R = H

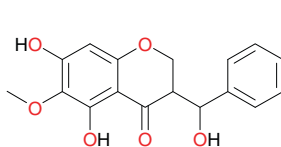

9-Hydroxyhomoisoflavanoid (28)

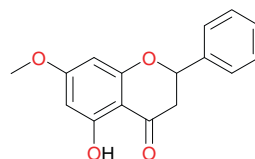

2,3-Dihydro-5-hydroxy-7-methoxy-2-phenylchromen-4-one (29)

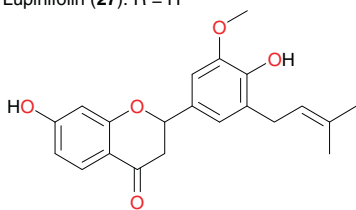

5-Deoxyabyssinin II (30)

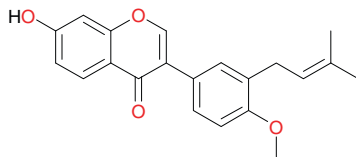

5-Deoxy-3'-prenylbiochanin A (34)

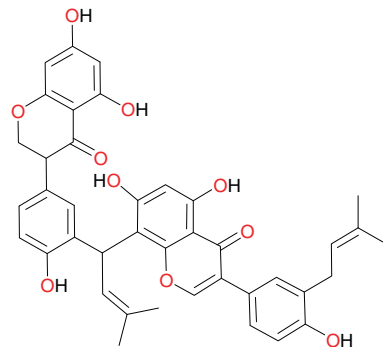

Mucisoflavone C (33)

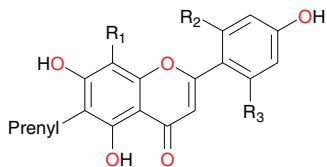

Artocarpesin (31): R<sub>1</sub> = H, R<sub>2</sub> = OH, R<sub>3</sub> = H

Kushenol E (32): R<sub>1</sub> = Prenyl, R<sub>2</sub> = H, R<sub>3</sub> = OH
